# Supplementary material
Source: PubMed Central journal article supplement (PMC6093808)
Supplement: NIHMS946011-supplement.pdf [file NIHMS946011-supplement.pdf]

## Default Mode Connectivity in Major Depressive Disorder Measured Up to 10 Days After Ketamine Administration

### *Supplemental Information*

#### Supplemental Methods

##### *Imaging Parameters*

First, a high resolution anatomical scan was acquired (3D fast spoiled gradient recalled echo (FSPGR), repetition time (TR): 8.8 s, echo time (TE): 3.4 ms, inversion recovery time (IR): 450 ms, flip angle (FA): 13 degrees, 1mm isotropic resolution). A whole brain, eight-minute gradient recalled echo planar image (EPI) resting state scan with the subject's eyes closed was then performed (fMRI parameters: 192 time points, TR:2.5 s, TE: 25 ms, FA: 90 degrees, resolution: 3.75x3.75x3.5 mm, matrix 64x64, 45 sagittal slices, phase encode direction: anterior-posterior, interleaved acquisition).

##### *Data Preprocessing*

Preprocessing was performed using the `afni_proc.py` script and included: despiking, slice timing correction, physiological noise correction (slice based, generated with McRetroTS), and motion correction (12-parameter affine, registered to the third volume), blurring to 6 mm full-width-at-half-maximum (FWHM), motion censoring, bandpass filtering between 0.01 and 0.1 Hz, and alignment to Montreal Neurological Institute (MNI) 152 standard space. For the alignment procedure, the anatomical image was first aligned to the EPI image using an affine transform with the LPC cost-function (`align_epi_anat.py`) using a weight mask created from the square root of

fALFF (1) (3dRSFC, truncated at a maximum value of 60 for intensity normalization purposes) calculated from the resting state time series. This was done to improve alignment of the low contrast EPI to the internal brain structures of the anatomical image. The anatomical image was then non-linearly warped to the MNI 152 standard template. The EPI was transformed to standard space using the concatenated transformation matrices generated from the anatomical alignment steps. Motion (de-means and derivative) regressors were also removed from the original time series simultaneously with bandpassing.

Data points were censored if there was more than an estimated 0.2 mm of motion (Euclidean norm) per TR. The dataset was excluded from further analysis if there were more than 15 censored time points.

## Supplemental Tables

Supplemental Table S1. Demographics for MDD and HC groups

|                                                             | MDD<br>(n = 33) |    | HC<br>(n = 25) |    |
|-------------------------------------------------------------|-----------------|----|----------------|----|
| Age (mean, std. dev)                                        | 36              | 10 | 33             | 10 |
| Sex (n F, %)                                                | 20              | 61 | 15             | 60 |
| BMI (mean, std. dev)                                        | 27              | 5  | 27             | 4  |
| Age of Onset (years, std. dev)                              | 15              | 6  |                |    |
| Length of Current Illness (months, std. dev)*               | 43              | 69 |                |    |
| Length of Illness (years, std. dev)                         | 20              | 11 |                |    |
| Number of failed antidepressant trials<br>(mean, std. dev.) | 6               | 3  |                |    |

\* Two subjects did not report the length of their current illness. MDD: major depressive disorder; HC: healthy control; BMI: body mass index.

Supplemental Table S2. Number of scans conducted in the MDD and HC groups\*.

|     |             | baseline ( <i>b</i> ) | ketamine<br>Day 2 ( <i>k2</i> ) | ketamine<br>Day 10 ( <i>k10</i> ) | placebo<br>Day 2 ( <i>p2</i> ) | placebo<br>Day 10 ( <i>p10</i> ) |
|-----|-------------|-----------------------|---------------------------------|-----------------------------------|--------------------------------|----------------------------------|
| MDD | total scans | 30                    | 29                              | 27                                | 26                             | 27                               |
|     | analysis    | 24                    | 26                              | 24                                | 25                             | 26                               |
| HC  | total scans | 24                    | 22                              | 17                                | 20                             | 14                               |
|     | analysis    | 21                    | 19                              | 12                                | 19                             | 10                               |

\*The table lists the total number of scans completed as well as the number of scans used in the analysis that had complete physiological data and motion within the limit. MDD: major depressive disorder; HC: healthy control.

**Supplemental Table S3. Centers of mass of significant regions for the group difference maps for each scan day**

| Scan                              | Volume | Center of Mass                 |       |       | Mean<br>(Z) | SEM   |      |
|-----------------------------------|--------|--------------------------------|-------|-------|-------------|-------|------|
|                                   |        | location                       | RL    | AP    |             |       | IS   |
| <b>Baseline (b)</b>               | 309    | Left Precentral Gyrus          | 50.2  | 7.9   | 13.9        | 1.75  | 0.02 |
|                                   | 270    | Right Inferior Frontal Gyrus   | -48.4 | -9.4  | 24.5        | 1.83  | 0.02 |
| <b>Ketamine,<br/>Day 2 (k2)</b>   | 532    | Left Cingulate Gyrus           | 4.9   | -6.4  | 43          | 1.94  | 0.02 |
|                                   | 425    | Left Inferior Parietal Lobule  | 49.6  | 37.8  | 22.3        | 1.93  | 0.02 |
|                                   | 395    | Right Inferior Parietal Lobule | -51.7 | 34    | 34.2        | 1.96  | 0.02 |
|                                   | 223    | Right Middle Frontal Gyrus     | -42.2 | -12.3 | 32.6        | 1.82  | 0.02 |
|                                   | 7      | Right Inferior Frontal Gyrus   | -46.9 | -10.8 | 21.1        | 2.60  | 0.02 |
| <b>Ketamine,<br/>Day 10 (k10)</b> | 668    | Right Inferior Parietal Lobule | -41.5 | 45.2  | 44.3        | 2.63  | 0.02 |
|                                   | 622    | Right Cingulate Gyrus          | -0.9  | -7.7  | 45.9        | 2.38  | 0.02 |
|                                   | 595    | Left Inferior Frontal Gyrus    | 44.6  | -8.1  | 23.8        | 2.42  | 0.02 |
|                                   | 537    | Left Inferior Parietal Lobule  | 40.2  | 44.3  | 44          | 2.39  | 0.02 |
|                                   | 307    | Right Supramarginal Gyrus      | -40.4 | 53    | 24.6        | -2.28 | 0.05 |
|                                   | 254    | Left Middle Frontal Gyrus      | 43.3  | -40.7 | 16.1        | 2.83  | 0.04 |
| <b>Placebo,<br/>Day 2 (p2)</b>    | 770    | Right Precentral Gyrus         | -53.3 | 6.5   | 21.2        | 2.02  | 0.01 |
|                                   | 297    | Left Inferior Parietal Lobule  | 56.1  | 24.9  | 29.8        | 2.02  | 0.02 |
|                                   | 288    | Left Superior Frontal Gyrus    | 6.5   | -6.1  | 56.3        | 2.01  | 0.02 |
|                                   | 193    | Left Insula                    | 46.3  | -2.9  | 10.6        | 1.82  | 0.02 |
| <b>Placebo,<br/>Day 10 (p10)</b>  | 880    | Right Precentral Gyrus         | -45.3 | 22.9  | 36.2        | 2.23  | 0.02 |
|                                   | 686    | Left Cingulate Gyrus           | 23.3  | 10.9  | 40.3        | 2.02  | 0.01 |
|                                   | 325    | Right Posterior Cingulate      | -5.3  | 70.1  | 10.6        | 1.93  | 0.02 |

Cluster centers of mass are indicated in Montreal Neurological Institute (MNI) coordinates where RL: right/left; AP: anterior/posterior; IS: inferior/superior. SEM: standard error of the mean.

**Supplemental Table S4. Centers of mass of the significant clusters for the group maps for the *ketamine-placebo* contrast at Day 2 and Day 10 in both MDD and HC subjects.**

| Group | Scan   | Volume | Center of Mass                 |       |       | Mean<br>(Z) | SEM   |      |
|-------|--------|--------|--------------------------------|-------|-------|-------------|-------|------|
|       |        |        | location                       | RL    | AP    |             |       | IS   |
| MDD   | Day 2  | 2231   | Right Paracentral Lobule       | -10.5 | 22.4  | 47          | 1.38  | 0.01 |
|       |        | 730    | Right Middle Occipital Gyrus   | -26.7 | 72    | 1.1         | 1.43  | 0.01 |
|       |        | 701    | Left Lingual Gyrus             | 22.1  | 65.9  | -6          | 1.35  | 0.01 |
|       |        | 387    | Left Postcentral Gyrus         | 55.6  | 13    | 24.5        | 1.38  | 0.01 |
|       | Day 10 | 1804   | Right Cuneus                   | -0.9  | 67.1  | 4.7         | -1.40 | 0.01 |
|       |        | 569    | Right Medial Frontal Gyrus     | -20.1 | -10.5 | 48.9        | 1.47  | 0.01 |
|       |        | 490    | Left Medial Frontal Gyrus      | 3.8   | -52.9 | 18.8        | -1.63 | 0.02 |
|       |        | 293    | Left Middle Frontal Gyrus      | 42.5  | -28.6 | 18.1        | 1.47  | 0.01 |
|       |        | 204    | Right Inferior Parietal Lobule | -47   | 49.3  | 46.5        | 1.69  | 0.02 |
|       |        |        |                                |       |       |             |       |      |
| HC    | Day 2  | 523    | Right Middle Frontal Gyrus     | -25.4 | -5.3  | 41.5        | 1.64  | 0.02 |
|       |        | 403    | Left Insula                    | 27.2  | 32.6  | 17          | 1.46  | 0.01 |
|       |        | 293    | Left Cuneus                    | 1.2   | 72    | 9.8         | 1.71  | 0.02 |
|       | Day 10 | 399    | Left Middle Frontal Gyrus      | 40.9  | -26.6 | 29.9        | -2.34 | 0.02 |
|       |        | 266    | Right Precentral Gyrus         | -31.7 | 6     | 29.4        | 1.84  | 0.02 |
|       |        | 218    | Left Precentral Gyrus          | 31.4  | 9.9   | 31          | 1.68  | 0.02 |
|       |        | 196    | Right Supramarginal Gyrus      | -49.3 | 51.3  | 24.1        | 2.24  | 0.03 |
|       |        |        |                                |       |       |             |       |      |

Cluster centers of mass are indicated in MNI coordinates. RL: right/left; AP: anterior/posterior; IS: inferior/superior. MDD: major depressive disorder; HC: healthy control; SEM: standard error of the mean.

## Supplemental Figures

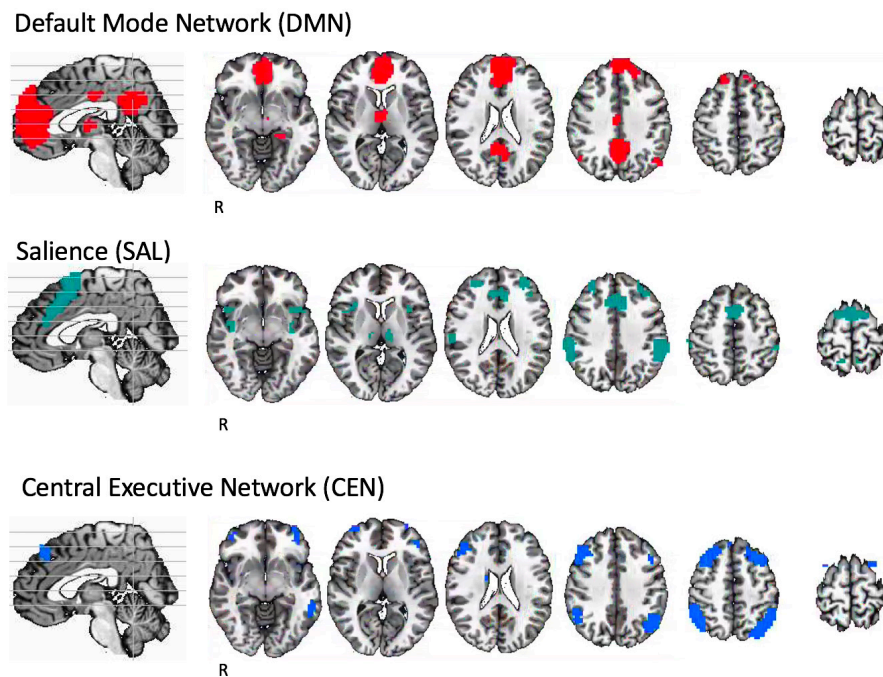

**Supplemental Figure S1.** Graphical region of interest (ROI) definitions for the default mode network (DMN), salience network (SAL), and central executive network (CEN). Further details and ROI files for download can be found at [https://findlab.stanford.edu/functional\\_ROIs.html](https://findlab.stanford.edu/functional_ROIs.html).

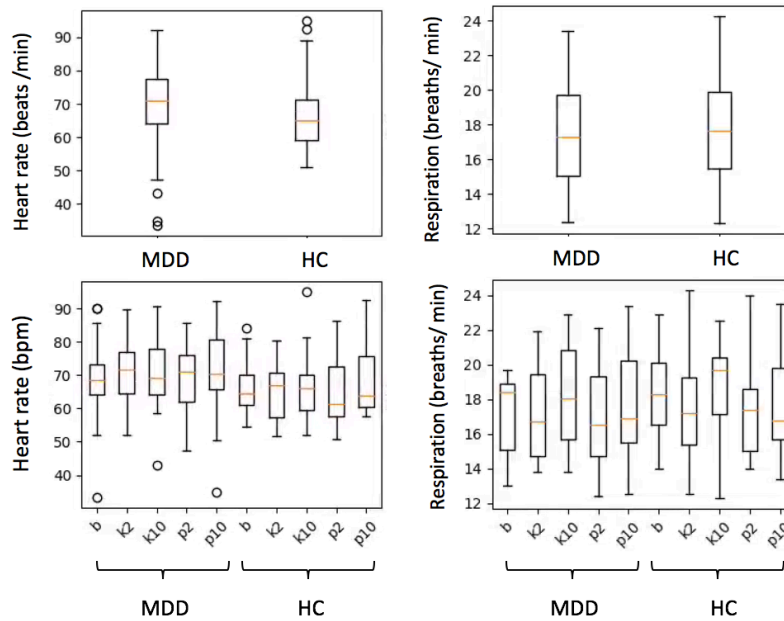

**Supplemental Figure S2.** Box-and-whisker plots of the heart (left column) and respiratory rate (right column) across groups (major depressive disorder (MDD), healthy control (HC)) in the first row and scans (*b,k2,p2,k10,p10*) in the second. The box outlines the first quartile, the median is indicated by the peach line within the box, whiskers show 1.5 of the inter-quartile range with outlier points shown as circles. Heart rate (beats/minute) is shown in the left column of plots, and respiration rate (breaths/minute) is shown on the right. The first row of plots shows a trend for higher heart rates in MDD (median=70 bpm) than HC (median=63 bpm) subjects, but no significant difference in respiration rate. The second row shows no significant different in heart rate or respiration between any scans.

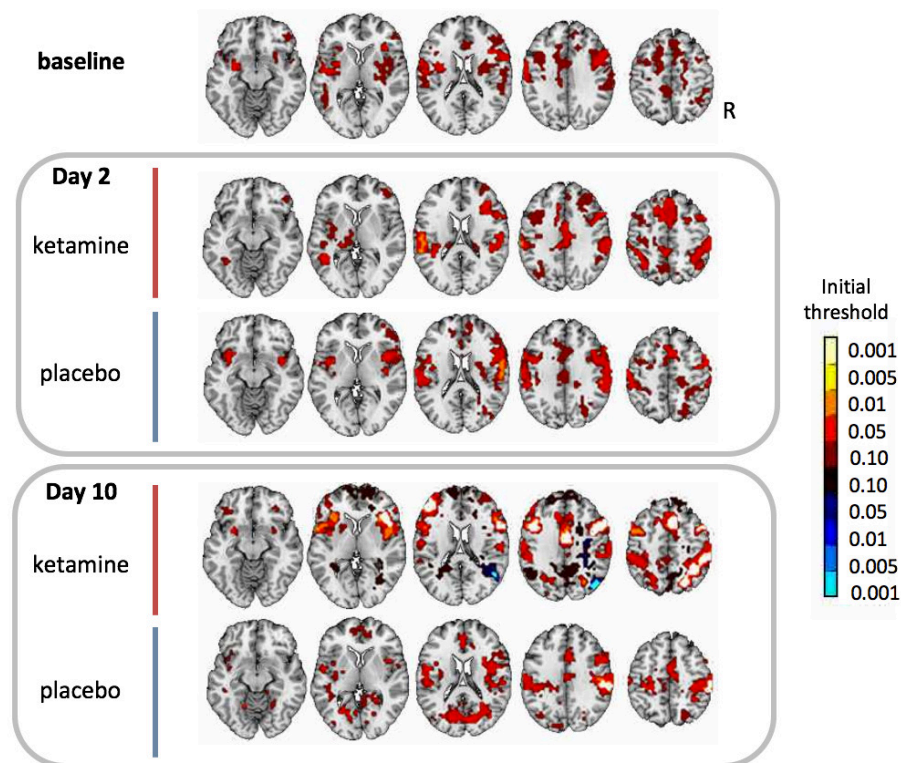

**Supplemental Figure S3.** Group difference maps for healthy controls (HCs) and major depressive disorder (MDD) subjects shown at familywise error (FWE) corrected  $p < 0.05$ . The overlay color indicates the lowest initial threshold the cluster survived. The maps were created by first choosing an initial threshold, calculating the FWE cluster size, and cluster correcting to  $p < 0.05$ . The map from each initial threshold was overlaid and assigned a color.



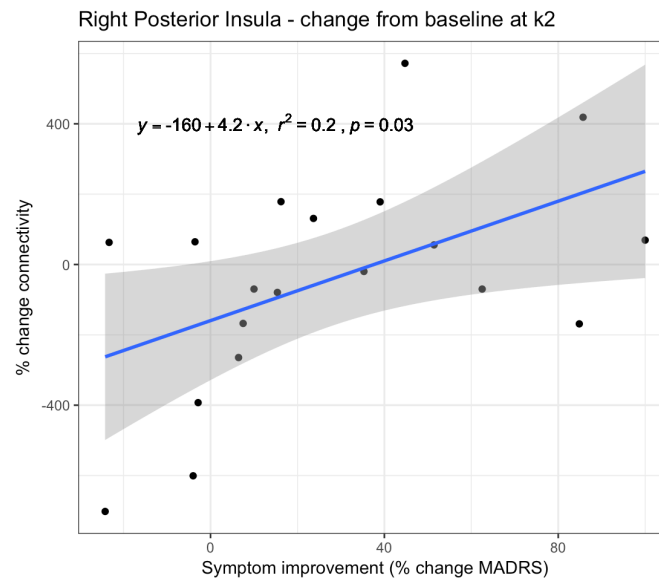

**Supplemental Figure S4.** Correlation between symptom improvement and change in connectivity between the right posterior insula and the DMN posterior cingulate cortex (PCC) between baseline and Day 2 post-ketamine administration scans. Symptom improvement is percent change in MADRS *b-k2* (such that a positive change is reflected by a decrease in depressive symptoms), and percent change in connectivity is *k2-b*. The black dots are individual subject data, the blue line is the line of best fit, and the gray area is the confidence region of the fit. The equation of the line of best fit is shown on the graph along with the  $r^2$  and  $p$ -values.

### Supplemental Reference

1. Zou Q-H, Zhu C-Z, Yang Y, Zuo X-N, Long X-Y, Cao Q-J, *et al.* (2008): An improved approach to detection of amplitude of low-frequency fluctuation (ALFF) for resting-state fMRI: fractional ALFF. *J Neurosci Methods*. 172: 137–41.
